# Supplementary material for: Modulating the multiple intrinsic properties of platinum–iron alloy nanowires towards enhancing collaborative electrocatalysis
Source: Royal Society of Chemistry journal article supplement (doi:10.1039/d1qm01136g), 2021-01-01
Supplement: d1qm01136g1.pdf [file d1qm01136g1.pdf]

**Supporting Information**  
**Modulating the Multiple Intrinsic Properties of Platinum-Iron Alloy Nanowires**  
**towards Enhancing Collaborative Electrocatalysis**

Fangfang Chang<sup>a</sup>, Juncai Wei<sup>a</sup>, Qing Zhang<sup>a</sup>, Zhichao Jia<sup>a</sup>, Yongpeng Liu<sup>a</sup>, Lin Yang<sup>a\*</sup>,  
Xiaolei Wang<sup>b</sup> and Zhengyu Bai<sup>a\*</sup>

<sup>a</sup> Collaborative Innovation Center of Henan Province for Green Manufacturing of Fine Chemicals, Key Laboratory of Green Chemical Media and Reactions, Ministry of Education, School of Chemistry and Chemical Engineering, Henan Normal University, Xinxiang, Henan 453007, China. Email: [baizhengyu@htu.edu.cn](mailto:baizhengyu@htu.edu.cn); [yanglin@htu.edu.cn](mailto:yanglin@htu.edu.cn)  
<sup>b</sup> Department of Chemical and Materials Engineering, University of Alberta, Edmonton, Alberta T6G 1H9, Canada

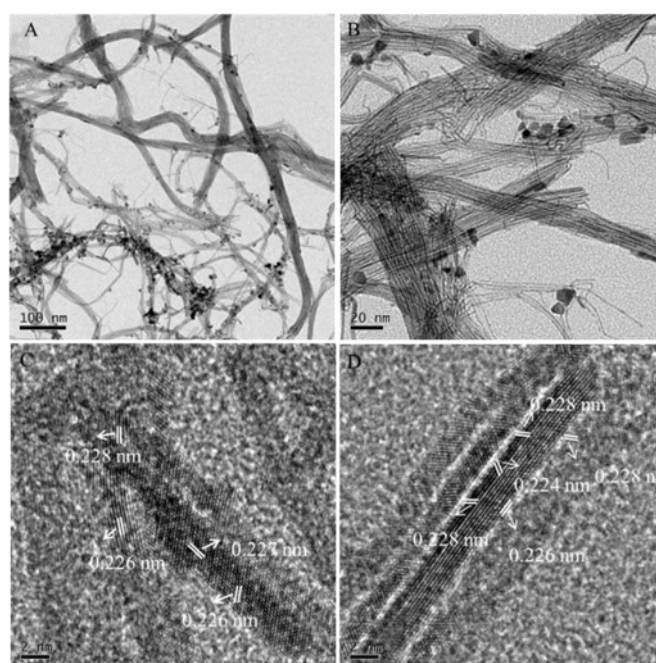

**Fig. S1** TEM images (A-B) and HR-TEM images (C-D) of Pt NWs

**Table S1.** Summary of Particle Sizes and Lattice Constants for PtNi NWs/C Catalysts

| Catalysts                            | NWs size (nm) | Scherrer size (nm) | Lattice parameter (nm) |
|--------------------------------------|---------------|--------------------|------------------------|
| Pt <sub>18</sub> Fe <sub>82</sub> /C | 20±2.3        | 19±2.1             | 0.3713                 |
| Pt <sub>36</sub> Fe <sub>64</sub> /C | 2.5±0.4       | 2.2±0.5            | 0.3782                 |
| Pt <sub>62</sub> Fe <sub>38</sub> /C | 2.1±0.3       | 2.0±0.3            | 0.3796                 |
| Pt <sub>77</sub> Fe <sub>23</sub> /C | 1.6±0.2       | 1.8±0.2            | 0.3813                 |
| Pt/C                                 | 2.1±0.3       | 1.9±0.3            | 0.3920                 |

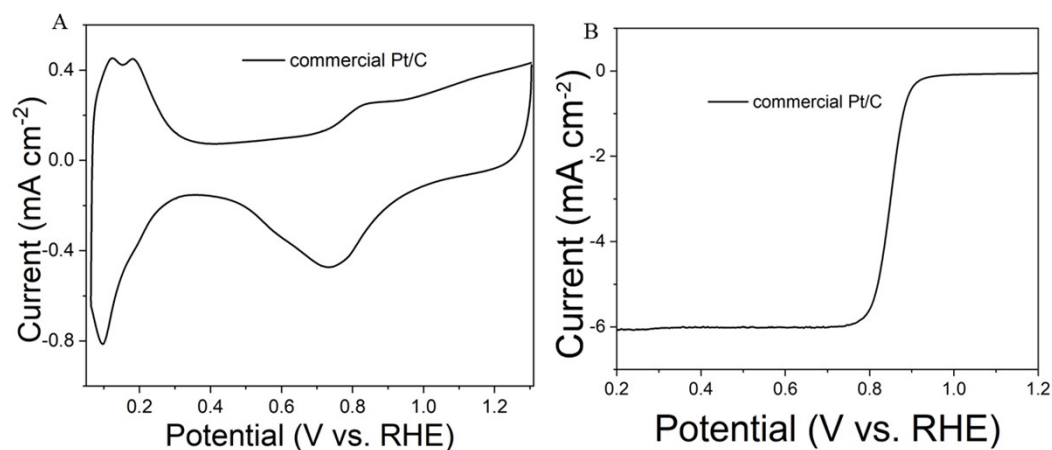

**Fig. S2.** (A) CV and (B) RDE curves for commercial Pt/C in 0.1 M HClO<sub>4</sub> solution saturated with nitrogen (scan rate: 50 mV/s) and oxygen (scan rate: 10 mV/s and rotation speed: 1600 rpm)

**Table S2.** Summary of physical and ORR data for Pt<sub>n</sub>Fe<sub>100-n</sub> NWs/C catalysts

| Catalysts                            | Metal loading<br>(%wt) | ECSA<br>(m <sup>2</sup> /g) | Mass activity<br>(A/mg) | Specific activity<br>(mA/cm <sup>2</sup> ) |
|--------------------------------------|------------------------|-----------------------------|-------------------------|--------------------------------------------|
| Pt <sub>18</sub> Fe <sub>82</sub> /C | 19.00%                 | 24.3                        | 0.40                    | 1.65                                       |
| Pt <sub>36</sub> Fe <sub>64</sub> /C | 20.00%                 | 35.0                        | 0.60                    | 1.71                                       |
| Pt <sub>62</sub> Fe <sub>38</sub> /C | 15.00%                 | 69.0                        | 1.03                    | 1.49                                       |
| Pt <sub>77</sub> Fe <sub>23</sub> /C | 16.00%                 | 76.0                        | 1.68                    | 2.21                                       |
| Pt NWs/C                             | 15.00%                 | 48.0                        | 0.54                    | 1.13                                       |

**Table S3.** Comparison of ORR activities of various catalysts

| Catalyst                                    | Mass activity<br>(A/mg) | Specific activity<br>(mA/cm <sup>2</sup> ) | Reference        |
|---------------------------------------------|-------------------------|--------------------------------------------|------------------|
| PtFe/Pt-V NWs                               | 1.1                     | 0.88                                       | 1                |
| Hollow PtFe                                 | 1.01                    | 2.73                                       | 2                |
| Ordered Fe <sub>3</sub> Pt on<br>nitride    | 0.67                    | 1.28                                       | 3                |
| 3D PtFe clusters                            | 1.26                    | 1.51                                       | 4                |
| Pt-skin hollow PtFe NPs                     | 0.993                   | 1.35                                       | 5                |
| PtFe NWs                                    | 0.844                   | 1.53                                       | 6                |
| <b>Pt<sub>77</sub>Fe<sub>23</sub>/C NWs</b> | <b>1.68</b>             | <b>2.21</b>                                | <b>This work</b> |

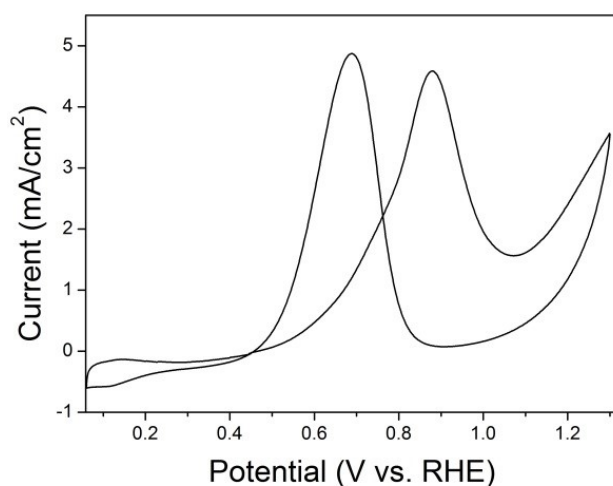

**Fig. S3** CV curve of commercial Pt/C in 0.1 M HClO<sub>4</sub> + 0.5 M CH<sub>3</sub>OH solution purged with N<sub>2</sub> at a scan rate of 50 50 mV/s

**Table S4.** Summary of physical and MOR data for Pt<sub>n</sub>Fe<sub>100-n</sub> NWs/C catalysts

| Catalysts                            | Mass activity (A/mg) | Specific activity (mA/cm <sup>2</sup> ) |
|--------------------------------------|----------------------|-----------------------------------------|
| Pt <sub>18</sub> Fe <sub>82</sub> /C | 0.39                 | 1.60                                    |
| Pt <sub>36</sub> Fe <sub>64</sub> /C | 0.52                 | 1.50                                    |
| Pt <sub>62</sub> Fe <sub>38</sub> /C | 1.73                 | 2.51                                    |
| Pt <sub>77</sub> Fe <sub>23</sub> /C | 1.98                 | 2.61                                    |
| Pt /C                                | 0.47                 | 0.98                                    |

**Table S5.** Comparison of MOR activities of various catalysts

| Catalyst                                                                        | Electrolyte                                         | Mass activity (A/mg) | Specific activity (mA/cm <sup>2</sup> ) | Reference        |
|---------------------------------------------------------------------------------|-----------------------------------------------------|----------------------|-----------------------------------------|------------------|
| PtFe-Pt <sub>x</sub> Fe <sub>y</sub> Ce <sub>2</sub> O <sub>j</sub> Nanohybrids | 0.1 M HClO <sub>4</sub> + 0.5 M Methanol            | 0.734                | 3.28                                    | 7                |
| PtFe Intermetallic nanotube                                                     | 0.5 M H <sub>2</sub> SO <sub>4</sub> + 1 M Methanol | 0.536                | 6.16                                    | 8                |
| Ga-Pt Intermetallic nanoparticle embedded in graphene                           | 0.5 M KOH + 2 M Methanol                            | 0.076                | 1.48                                    | 9                |
| Pt <sub>3</sub> Ti/C intermetallic nanoparticle                                 | 0.1 M HClO <sub>4</sub> + 1 M Methanol              | 0.149                | 0.03                                    | 10               |
| Pt <sub>3</sub> V/C intermetallic nanoparticle                                  | Methanol                                            | 0.2                  | 0.038                                   |                  |
| Intermetallic Pt <sub>3</sub> Zn nanocrystals                                   | 1.0 M Methanol                                      | 0.25                 | 0.95                                    | 11               |
| <b>Pt<sub>77</sub>Fe<sub>23</sub>/C NWs</b>                                     | <b>0.1 M HClO<sub>4</sub> + 0.5 M Methanol</b>      | <b>1.98</b>          | <b>2.61</b>                             | <b>This work</b> |

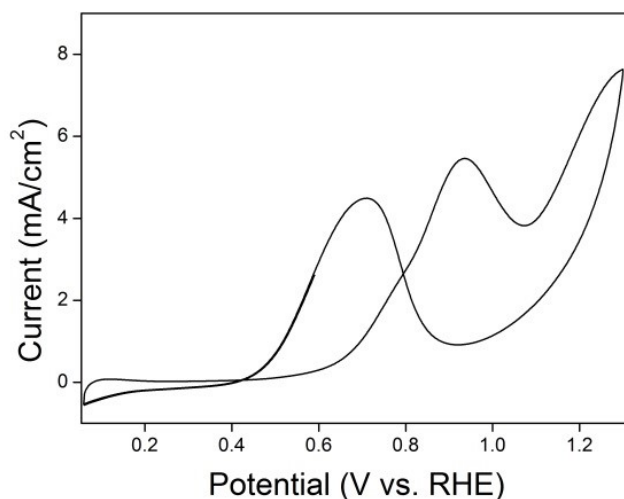

**Fig. S4** CV curve of commercial Pt/C in 0.1 M HClO<sub>4</sub> + 0.5 M C<sub>2</sub>H<sub>5</sub>OH solution purged with N<sub>2</sub> at a scan rate of 50 mV/s

**Table S6.** Summary of physical and EOR data for Pt<sub>n</sub>Fe<sub>100-n</sub> NWs/C catalysts

| Catalysts                            | Mass activity (A/mg) | Specific activity (mA/cm <sup>2</sup> ) |
|--------------------------------------|----------------------|-----------------------------------------|
| Pt <sub>18</sub> Fe <sub>82</sub> /C | 0.45                 | 1.85                                    |
| Pt <sub>36</sub> Fe <sub>64</sub> /C | 0.68                 | 1.94                                    |
| Pt <sub>62</sub> Fe <sub>38</sub> /C | 1.14                 | 1.65                                    |
| Pt <sub>77</sub> Fe <sub>23</sub> /C | 1.32                 | 1.74                                    |
| Pt NWs/C                             | 0.32                 | 0.67                                    |

**Table S7.** Comparison of EOR activities of various catalysts

| Catalyst                                                  | Electrolyte                                          | Mass activity (A/mg) | Specific activity (mA/cm <sup>2</sup> ) | Reference        |
|-----------------------------------------------------------|------------------------------------------------------|----------------------|-----------------------------------------|------------------|
| Pt <sub>1</sub> Fe <sub>0.20</sub> Sn <sub>0.46</sub> NWs | 0.1 M HClO <sub>4</sub> + 0.5 M Ethanol              | 1.21                 |                                         | 12               |
| PtCu <sub>2.1</sub> NWs                                   | 0.1 M HClO <sub>4</sub> + 0.2 M Ethanol              | 1.015                | 2.16                                    | 13               |
| PtPb <sub>0.27</sub> NWs                                  | 0.1 M HClO <sub>4</sub> + 0.15 M Ethanol             | ~ 1.7                | ~ 0.9                                   | 14               |
| PtRhNi/C                                                  | 0.5 M HClO <sub>4</sub> + 1 M Ethanol                | 0.378                |                                         | 15               |
| RDH PtNi NFs                                              | 0.5 M H <sub>2</sub> SO <sub>4</sub> + 0.1 M Ethanol | 0.98                 | 1.79                                    | 16               |
| <b>Pt<sub>77</sub>Fe<sub>23</sub>/C NWs</b>               | <b>0.1 M HClO<sub>4</sub>+0.5 M Ethanol</b>          | <b>1.32</b>          | <b>1.74</b>                             | <b>This work</b> |

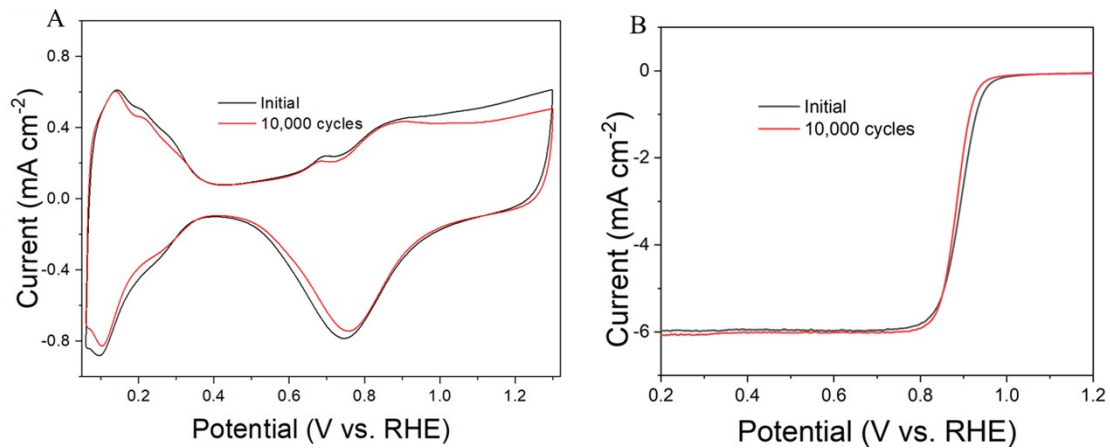

**Fig. S5** (A) CV and (B) RDE curves for commercial Pt/C before and after 10,000 potential cycles (sweep rate, 100 mV/s, potential cycle window: 0.6 and 1.1 V) in 0.1 M HClO<sub>4</sub> solution saturated with nitrogen and oxygen (scan rate: 10 mV/s and rotation speed: 1600 rpm).

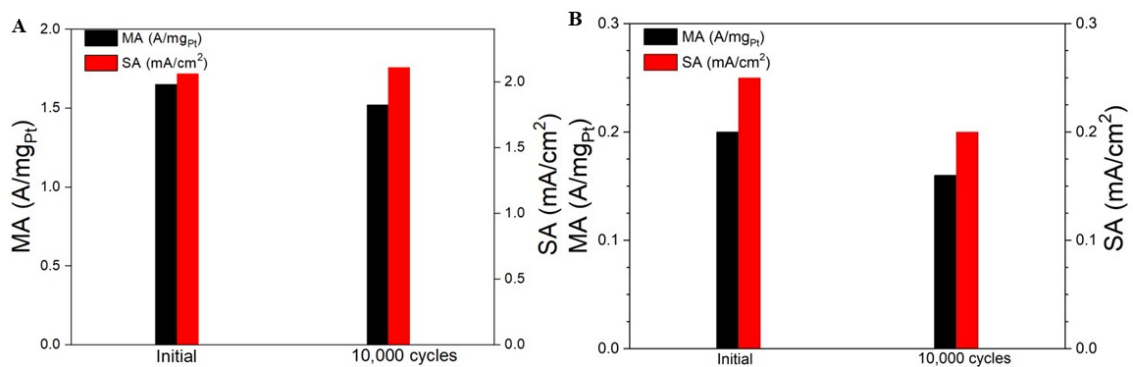

**Fig. S6** Mass activity and specific activity data (A) Pt<sub>77</sub>Fe<sub>23</sub>/C NWs and (B) commercial Pt/C at 0.900 V (vs. RHE) before and after 10,000 cycles.

**Table S8.** The electron configuration and natural atomic charge of the optimized structure of  $\text{Pt}_x\text{Fe}_{4-x}$  ( $x=1, 2, 3, 4$ ) clusters

| cluster                  | atom No | electron configuration                          | charge | e-transfer                                                                          |
|--------------------------|---------|-------------------------------------------------|--------|-------------------------------------------------------------------------------------|
| $\text{Pt}_4$            | 1Pt     | $6s^{0.57}5d^{9.41}6p^{0.08}$                   | 0.00   | 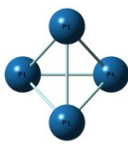 |
|                          | 2Pt     | $6s^{0.057}5d^{9.41}6p^{0.08}$                  | 0.00   |                                                                                     |
|                          | 3Pt     | $6s^{0.057}5d^{9.41}6p^{0.08}$                  | 0.00   |                                                                                     |
|                          | 4Pt     | $6s^{0.057}5d^{9.41}6p^{0.08}$                  | 0.00   |                                                                                     |
| $\text{Pt}_3\text{Fe}_1$ | 1Fe     | $4s^{0.44}3d^{6.86}4p^{0.18}$                   | 0.450  |  |
|                          | 2Pt     | $6s^{0.72}5d^{9.37}6p^{0.09}$                   | -0.154 |                                                                                     |
|                          | 3Pt     | $6s^{0.71}5d^{9.38}6p^{0.09}$                   | -0.148 |                                                                                     |
|                          | 4Pt     | $6s^{0.71}5d^{9.38}6p^{0.09}$                   | -0.148 |                                                                                     |
| $\text{Pt}_2\text{Fe}_2$ | 1Fe     | $4s^{0.61}3d^{6.89}4p^{0.31}$                   | 0.087  |  |
|                          | 2Pt     | $6s^{0.87}5d^{9.23}6p^{0.11}$                   | -0.183 |                                                                                     |
|                          | 3Pt     | $6s^{0.87}5d^{9.23}6p^{0.11}$                   | -0.183 |                                                                                     |
|                          | 4Fe     | $4s^{0.57}3d^{7.04}4p^{0.12}5p^{0.07}$          | 0.279  |                                                                                     |
| $\text{Pt}_1\text{Fe}_3$ | 1Fe     | $4s^{0.65}3d^{7.14}4p^{0.08}4d^{0.01}5p^{0.14}$ | 0.111  |  |
|                          | 2Pt     | $6s^{1.06}5d^{9.31}6p^{0.07}$                   | -0.287 |                                                                                     |
|                          | 3Fe     | $4s^{0.56}3d^{7.02}4p^{0.09}5p^{0.12}$          | 0.088  |                                                                                     |
|                          | 4Fe     | $4s^{0.56}3d^{7.02}4p^{0.09}5p^{0.12}$          | 0.088  |                                                                                     |

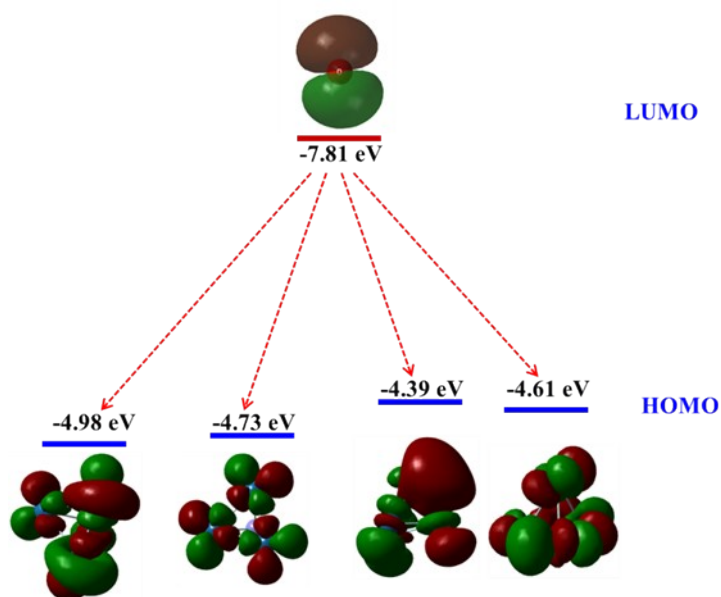

**Fig. S7** Frontier molecular orbitals and the energy of LUMO of O atom and HOMO of  $\text{Pt}_x\text{Fe}_{4-x}$  ( $x = 4, 3, 2, 1$ ) clusters

**Table S9.** Structure and binding energy ((eV) for  $\text{Pt}_x\text{Fe}_{10-x}$  ( $x=2, 4, 6, 8, 10$ ) clusters

| Pt <sub>2</sub> Fe <sub>8</sub>                                                   | Pt <sub>4</sub> Fe <sub>6</sub>                                                   | Pt <sub>6</sub> Fe <sub>4</sub>                                                   | Pt <sub>8</sub> Fe <sub>2</sub>                                                     | Pt <sub>10</sub>                                                                    |
|-----------------------------------------------------------------------------------|-----------------------------------------------------------------------------------|-----------------------------------------------------------------------------------|-------------------------------------------------------------------------------------|-------------------------------------------------------------------------------------|
| 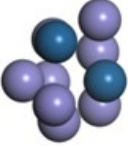 |  |  |  |  |
| -4.54                                                                             | -3.96                                                                             | -2.79                                                                             | -2.24                                                                               | -2.20                                                                               |

**Table S10.** Structure and adsorption energy (eV) for O Pt<sub>x</sub>Fe<sub>10-x</sub> (x=2, 4, 6, 8, 10) clusters

|   | Pt <sub>2</sub> Fe <sub>8</sub>                                                   | Pt <sub>4</sub> Fe <sub>6</sub>                                                   | Pt <sub>6</sub> Fe <sub>4</sub>                                                   | Pt <sub>8</sub> Fe <sub>2</sub>                                                     | Pt <sub>10</sub>                                                                    |
|---|-----------------------------------------------------------------------------------|-----------------------------------------------------------------------------------|-----------------------------------------------------------------------------------|-------------------------------------------------------------------------------------|-------------------------------------------------------------------------------------|
|   | 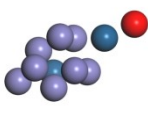 |  |  |  |  |
| O | -0.18                                                                             | -0.27                                                                             | -5.07                                                                             | -4.99                                                                               | -4.53                                                                               |

**Table S11.** Structure and adsorption energy (eV) for OOH Pt<sub>x</sub>Fe<sub>10-x</sub> (x=2, 4, 6, 8, 10) clusters

|     | Pt <sub>2</sub> Fe <sub>8</sub>                                                     | Pt <sub>4</sub> Fe <sub>6</sub>                                                     | Pt <sub>6</sub> Fe <sub>4</sub>                                                     | Pt <sub>8</sub> Fe <sub>2</sub>                                                       | Pt <sub>10</sub>                                                                      |
|-----|-------------------------------------------------------------------------------------|-------------------------------------------------------------------------------------|-------------------------------------------------------------------------------------|---------------------------------------------------------------------------------------|---------------------------------------------------------------------------------------|
|     | 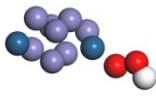 |  |  |  |  |
| OOH | -1.38                                                                               | -0.785                                                                              | -5.74                                                                               | -2.21                                                                                 | -1.59                                                                                 |

**Table S12.** Structure and adsorption energy (eV) for OH Pt<sub>x</sub>Fe<sub>10-x</sub> (x=2, 4, 6, 8, 10) clusters

|    | Pt <sub>2</sub> Fe <sub>8</sub>                                                   | Pt <sub>4</sub> Fe <sub>6</sub>                                                   | Pt <sub>6</sub> Fe <sub>4</sub>                                                   | Pt <sub>8</sub> Fe <sub>2</sub>                                                     | Pt <sub>10</sub>                                                                    |
|----|-----------------------------------------------------------------------------------|-----------------------------------------------------------------------------------|-----------------------------------------------------------------------------------|-------------------------------------------------------------------------------------|-------------------------------------------------------------------------------------|
|    | 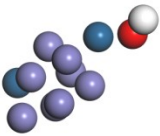 |  |  |  |  |
| OH | -2.65                                                                             | -1.32                                                                             | -2.98                                                                             | -3.02                                                                               | -2.41                                                                               |

**Table S13.** Structure and adsorption energy (eV) for CO Pt<sub>x</sub>Fe<sub>10-x</sub> (x=2, 4, 6, 8, 10) clusters

|    | Pt <sub>2</sub> Fe <sub>8</sub>                                                   | Pt <sub>4</sub> Fe <sub>6</sub>                                                   | Pt <sub>6</sub> Fe <sub>4</sub>                                                    | Pt <sub>8</sub> Fe <sub>2</sub>                                                     | Pt <sub>10</sub>                                                                    |
|----|-----------------------------------------------------------------------------------|-----------------------------------------------------------------------------------|------------------------------------------------------------------------------------|-------------------------------------------------------------------------------------|-------------------------------------------------------------------------------------|
|    | 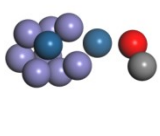 |  |  |  |  |
| CO | -0.18                                                                             | -0.27                                                                             | -5.07                                                                              | -4.99                                                                               | -4.53                                                                               |

**Table S14.** The correction of zero point energy and entropy of the adsorbed and gaseous species.

|                  | ZPE(eV) | TS(eV) |
|------------------|---------|--------|
| *OOH             | 0.35    | 0      |
| *O               | 0.05    | 0      |
| *OH              | 0.31    | 0.01   |
| H <sub>2</sub> O | 0.56    | 0.67   |
| H <sub>2</sub>   | 0.27    | 0.41   |

#### References:

- 1 Y. H. Shi, W. Yang, W. B. Gong, X. N. Wang, Y. R. Zhou, X. F. Shen, Y. L. Wu, J. T. Di, D. S. Zhang, Q. W. Li, Interconnected surface-vacancy-rich PtFe nanowires for efficient oxygen reduction, *J. Mater. Chem. A.*, 2021, **9**, 12845-12852.
- 2 Z. J. Yang, L. Shang, X. Y. Xiong, R. Shi, G. I. N. Waterhouse, T. R. Zhang, Hollow PtFe alloy nanoparticles derived from Pt-Fe<sub>3</sub>O<sub>4</sub> dimers through a silica-protection reduction strategy as efficient oxygen reduction electrocatalysts, *Chem-Eur. J.*, 2020, **26**, 4090-4096.
- 3 Q. B. Liu, L. Du, G. T. Fu, Z. M. Cui, Y. T. Li, D. Dang, X. Gao, Q. Zheng, J. B. Goodenough, Structurally ordered Fe<sub>3</sub>Pt nanoparticles on robust nitride support as a high performance catalyst for the oxygen reduction reaction, *Adv. Energy Mater.*, 2019, **9**, 1803040.
- 4 F. Lin, Y. J. Sun, J. P. Lai, K. Wang, Y. H. Tang, Y. G. Chao, Y. Yang, J. R. Feng, F. Lv, P. Zhou, M. H. Huang, S. J. Guo, 3D PtFe clusters with cube-in-cube structure enhance oxygen reduction catalysis and electrochemical sensing, *Small Methods*, 2018, **2**, 1800073.
- 5 Q. M. Wang, S. G. Chen, F. Shi, K. Chen, Y. Nie, Y. Wang, R. Wu, J. Li, Y. Zhang, W. Ding, Y. Li, L. Li, Z. D. Wei, Structural evolution of solid Pt nanoparticles to a hollow PtFe alloy with a Pt-skin surface via space-confined pyrolysis and the nanoscale kirkendall effect, *Adv. Mater.*, 2016, **28**, 10673-10678.



- 6 S. J. Guo, D. G. Li, H. Y. Zhu, S. Zhang, N. M. Markovic, V. R. Stamenkovic, S. H. Sun, FePt and CoPt nanowires as efficient catalysts for the oxygen reduction reaction, *Angew. Chem. Int. Ed.*, 2013, **52**, 3465-3468.
- 7 J. G. Ma, X. Tong, J. M. Wang, G. X. Zhang, Y. P. Lv, Y. C. Zhu, S. H. Sun, Y. C. Yang, Y. J. Song, Rare-earth metal oxide hybridized PtFe nanocrystals synthesized via microfluidic process for enhanced electrochemical catalytic performance, *Electrochim. Acta*, 2019, **299**, 80-88.
- 8 X. B. Zhang, S. J. Tian, W. J. Yu, B. Q. Lu, T. Y. Shen, L. Xu, D. M. Sun, S. L. Zhang, Y. W. Tang, Nanotube-shaped PtFe intermetallics: controlled synthesis, crystal structure, and improved electrocatalytic activities, *CrystEngComm*, 2018, **20**, 4277-4282.
- 9 V. B. Kumar, J. Sanetuntikul, P. Ganesan, Z. Porat, S. Shanmugam, A. Gedanken, Sonochemical formation of Ga-Pt intermetallic nanoparticles embedded in graphene and its potential use as an electrocatalyst, *Electrochim. Acta*, 2016, **190**, 659-667.
- 10 Z. M. Cui, H. Chen, M. T. Zhao, D. Marshall, Y. C. Yu, H. Abruña, F. J. DiSalvo, Synthesis of structurally ordered Pt<sub>3</sub>Ti and Pt<sub>3</sub>V nanoparticles as methanol oxidation catalysts, *J. Am. Chem. Soc.*, 2014, **136**, 10206-10209.
- 11 Y. J. Kang, J. B. Pyo, X. C. Ye, T. R. Gordon, C. B. Murray, Synthesis, shape control, and methanol electro-oxidation properties of Pt-Zn alloy and Pt<sub>3</sub>Zn intermetallic nanocrystals, *ACS Nano*, 2012, **6**, 5642-5647.
- 12 C. Wang, H. Xu, F. Gao, Y. P. Zhang, T. X. Song, C. Q. Wang, H. Y. Shang, X. Zhu, Y. K. Du, High-density surface protuberances endow ternary PtFeSn nanowires with high catalytic performance for efficient alcohol electro-oxidation, *Nanoscale*, 2019, **11**, 18176-18182.
- 13 N. Zhang, L. Z. Bu, S. J. Guo, J. Guo, X. Q. Huang, Screw thread-like platinum-copper nanowires bounded with high-index facets for efficient electrocatalysis, *Nano Lett.*, 2016, **16**, 5037-5043.
- 14 N. Zhang, S. J. Guo, X. Zhu, J. Guo, X. Q. Huang, Hierarchical Pt/Pt<sub>x</sub>Pb core/shell nanowires as efficient catalysts for electrooxidation of liquid fuels, *Chem. Mater.*, 2016, **28**, 4447-4452.
- 15 N. Erini, S. Rudi, V. Beermann, P. Krause, R. Z. Yang, Y. H. Huang, P. Strasser, Exceptional activity of a Pt-Rh-Ni ternary nanostructured catalyst for the electrochemical oxidation of ethanol, *ChemElectroChem*, 2015, **2**, 903-908.
- 16 J. B. Ding, L. Z. Bu, S. J. Guo, Z. P. Zhao, E. B. Zhu, Y. Huang, X. Q. Huang, Morphology and phase controlled construction of Pt-Ni nanostructures for efficient electrocatalysis, *Nano Lett.*, 2016, **16**, 2762-2767.
